# Supplementary material for: Improved electrochemical performance of 2D accordion-like MnV2O6 nanosheets as anode materials for Li-ion batteries
Source: Royal Society of Chemistry journal article supplement (doi:10.1039/c9dt03845k), 2020-01-01
Supplement: c9dt03845k1.pdf [file c9dt03845k1.pdf]

## Supplementary Material

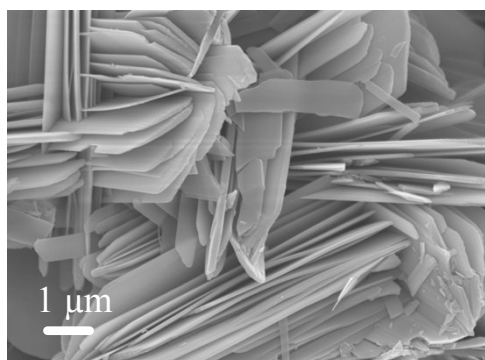

**Figure S1.** the SEM morphology of MVO samples

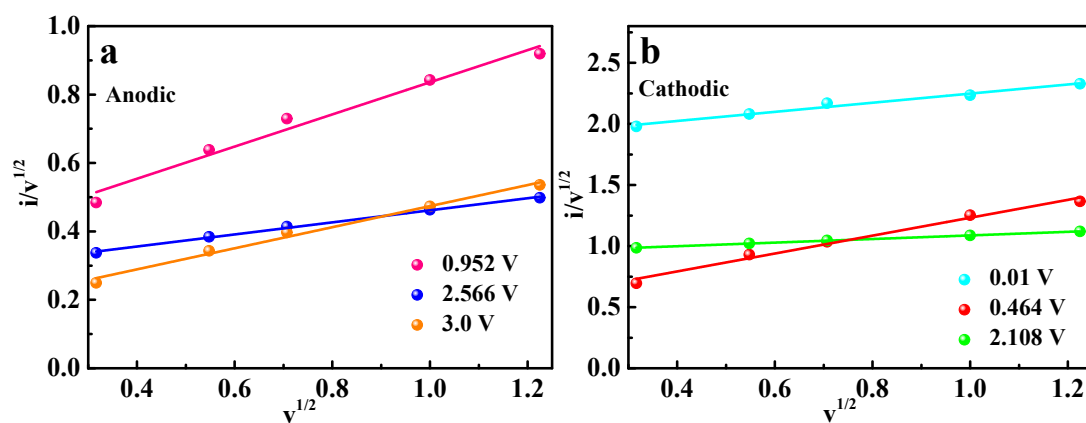

**Figure S2** Fitting curves of  $i/v^{1/2}$  responses plotted against  $v^{1/2}$  for anodic scans (a) and cathodic scans (b).
